# Supplementary material for: Different Causes of Functional Tricuspid Valve Regurgitation Are Linked to Differences in Tricuspid Valve and Right-Sided Heart Geometry and Function: 3D Echocardiography Study
Source: MDPI journal article supplement (doi:10.3390/medicina59010057), 2022-12-27
Supplement: s1 [file s1]

**Supplement Table S1. ROC analysis of severe fTR for all cohort.**

| <b>Variables</b>                                              | <b>AUC</b>  | <b>95% CI</b> | <b>p-value</b> | <b>J index</b> |
|---------------------------------------------------------------|-------------|---------------|----------------|----------------|
| <b>2D RV parameters</b>                                       |             |               |                |                |
| RV basal diameter, mm                                         | <b>.767</b> | .675-.860     | <.001          | .437           |
| RV middle diameter, mm                                        | <b>.744</b> | .651-.837     | <.001          | .392           |
| RV length, mm                                                 | .664        | .554-.773     | .006           | .258           |
| RV sphericity index, %                                        | .645        | .527-.763     | .016           | .295           |
| RV end-diastolic area, cm2                                    | <b>.724</b> | .621-.827     | <.001          | .407           |
| RV end-systolic area, cm2                                     | <b>.729</b> | .629-.828     | <.001          | .370           |
| FAC, %                                                        | .687        | .579-.794     | .002           | .375           |
| TAPSE, mm                                                     | .683        | .574-.791     | .003           | .304           |
| RV S', cm/s                                                   | .629        | .519-.739     | .032           | .231           |
| RV septal wall strain, %                                      | .550        | .276-.824     | .734           | .200           |
| RV lateral wall strain, %                                     | .450        | .176-.724     | .734           | .100           |
| <b>2D TV parameters</b>                                       |             |               |                |                |
| TA diastolic diameter, mm                                     | <b>.725</b> | .529-.821     | <.001          | .356           |
| TA diastolic diameter index, mm/m2                            | .697        | .590-.805     | .001           | .362           |
| TA systolic diameter, mm                                      | .688        | .587-.789     | .002           | .272           |
| TA systolic diameter index, mm/m2                             | .673        | .562-.783     | .004           | .301           |
| <b>3D RV parameters</b>                                       |             |               |                |                |
| RV end-diastolic volume, ml                                   | .645        | .525-.764     | .034           | .288           |
| RV end-systolic volume, ml                                    | .666        | .547-.785     | .015           | .299           |
| RV EF, %                                                      | <b>.700</b> | .581-.818     | .003           | .379           |
| <b>3D TA parameters</b>                                       |             |               |                |                |
| TA area, cm2                                                  | <b>.738</b> | .623-.854     | <.001          | .412           |
| TA area index (cm2/m2)                                        | .688        | .563-.812     | .006           | .379           |
| TA perimeter, mm                                              | <b>.735</b> | .616-.854     | .001           | .396           |
| TA perimeter index (cm/m2)                                    | .674        | .552-.797     | .011           | .275           |
| Septal-Lateral Systolic TA Diameter, mm                       | <b>.826</b> | .734-.917     | <.001          | .456           |
| Septal-Lateral Systolic TA Diameter Index, cm/m <sup>2</sup>  | <b>.724</b> | .610-.837     | .001           | .390           |
| Septal-Lateral Diastolic TA Diameter, mm                      | <b>.805</b> | .706-.904     | <.001          | .440           |
| Septal-Lateral Diastolic TA Diameter Index, mm/m <sup>2</sup> | .677        | .556-.799     | .009           | .352           |
| Anterior – Posterior TA Diameter, mm                          | .691        | .569-.813     | .005           | .385           |
| Anterior – Posterior TA Diameter Index, mm/m2                 | .643        | .521-.766     | .035           | .335           |
| Major Axis Systolic TA Diameter, mm                           | <b>.816</b> | .718-.913     | <.001          | .533           |
| Major Axis Systolic TA Diameter Index, mm/m2                  | .679        | .557-.801     | .008           | .299           |

|                                                           |             |           |       |      |
|-----------------------------------------------------------|-------------|-----------|-------|------|
| Major Axis Diastolic TA Diameter, mm                      | <b>.812</b> | .710-.914 | <.001 | .574 |
| Major Axis Diastolic TA Diameter Index, mm/m <sup>2</sup> | .682        | .561-.804 | .007  | .283 |
| Minor Axis Diastolic TA Diameter, mm                      | .657        | .525-.788 | .021  | .275 |
| Minor Axis Diastolic TA Diameter Index, mm/m <sup>2</sup> | .609        | .471-.747 | .111  | .242 |
| TV Leaflet Coaptation point Height, mm                    | .577        | .443-.712 | .256  | .132 |
| TV Leaflet Tenting Volume, ml                             | <b>.708</b> | .583-.833 | .002  | .385 |
| TV Sphericity Index, %                                    | .623        | .499-.746 | .072  | .294 |

RV – right ventricle, EF – ejection fraction, TV – tricuspid valve, TA – tricuspid annulus.

**Supplement Table S2. Prediction of severe fTR for patients with different aetiologies.**

| LVSP                                    |       |                  |         |             |             | PH    |                  |         |             |             |
|-----------------------------------------|-------|------------------|---------|-------------|-------------|-------|------------------|---------|-------------|-------------|
| Variables                               | AUC   | p-value          | Cut-off | Sensitivity | Specificity | AUC   | p-value          | Cut-off | Sensitivity | Specificity |
| <b>3D TV parameters</b>                 |       |                  |         |             |             |       |                  |         |             |             |
| TA perimeter, mm                        | 0.653 | 0.07             |         |             |             | 0.906 | <b>&lt;0.001</b> | 134     | 82          | 81          |
| TA area, cm <sup>2</sup>                | 0.678 | <b>0.04</b>      | 14      | 65          | 61          | 0.886 | <b>&lt;0.001</b> | 13      | 82          | 81          |
| TV Leaflet Tenting Volume, ml           | 0.627 | 0.14             |         |             |             | 0.824 | <b>&lt;0.001</b> | 48      | 82          | 63          |
| Septal-Lateral Systolic TA Diameter, mm | 0.761 | <b>&lt;0.001</b> | 43      | 71          | 61          | 0.898 | <b>&lt;0.001</b> | 45      | 82          | 81          |
| Anterior-Posterior TA Diameter, mm      | 0.676 | <b>0.04</b>      | 40      | 65          | 56          | 0.741 | <b>0.04</b>      | 36      | 64          | 63          |
| Major Axis Systolic TA Diameter, mm     | 0.747 | <b>&lt;0.001</b> | 47      | 76          | 67          | 0.929 | <b>&lt;0.001</b> | 47      | 91          | 81          |
| <b>2D TV parameters</b>                 |       |                  |         |             |             |       |                  |         |             |             |
| 4-Chambers Systolic Diameter, mm        | 0.706 | <b>0.008</b>     | 43      | 70          | 55          | 0.741 | <b>0.013</b>     | 44      | 71          | 64          |
| 4-Chambers Diastolic Diameter, mm       | 0.656 | <b>0.043</b>     | 39      | 75          | 45          | 0.719 | <b>0.025</b>     | 41      | 64          | 64          |
| <b>RV parameters</b>                    |       |                  |         |             |             |       |                  |         |             |             |
| RV basal diameter, mm                   | 0.765 | <b>&lt;0.001</b> | 46      | 75          | 67          | 0.774 | <b>0.005</b>     | 52      | 79          | 60          |
| RV middle diameter, mm                  | 0.768 | <b>&lt;0.001</b> | 36      | 85          | 63          | 0.790 | <b>0.003</b>     | 48      | 71          | 64          |
| RV length, mm                           | 0.709 | <b>0.01</b>      | 64      | 65          | 61          | 0.546 | 0.639            |         |             |             |
| RV end-systolic area, cm <sup>2</sup>   | 0.764 | <b>&lt;0.001</b> | 15      | 80          | 67          | 0.700 | <b>0.040</b>     | 23      | 79          | 60          |
| RV EF, %                                | 0.636 | 0.114            |         |             |             | 0.786 | <b>0.012</b>     | 29      | 76          | 73          |

TA - tricuspid annulus, TV - tricuspid valve, RV - right ventricle, EF - ejection fraction, LVSP – left-sided valvular pathology, PH – pulmonary hypertension
